# Supplementary material for: New controls on sedimentation and climate in the central equatorial Pacific Ocean
Source: Copernicus journal article supplement (doi:10.5194/gchron-7-123-2025), 2025-04-01
Supplement: Supplementary file 1 [file gchron-7-123-2025-supplement.zip]

## Sheet: All LI_Re Calibrated
Core	Water Depth (m)	Latitude (DDS)	Longitude (DDS)	Top Depth (cm)	14C Age (ka)	Age Err (ka)	Calibrated Median Age (ka)	Lower 2σ (ka)	Lower 1σ (ka)	Upper 1σ (ka)	Upper 2σ (ka)	Species	Source
ML1208-06BB	2371	6.408	161.007	2	4.96	0.08	5.072	0.454	0.218	0.211	0.418	G. ruber	This study
ML1208-06BB	2371	6.408	161.007	6	4.99	0.085	5.105	0.433	0.233	0.202	0.44	G. ruber	This study
ML1208-06BB	2371	6.408	161.007	8	6.03	0.025	6.256	0.353	0.181	0.182	0.362	G. sacculifer	Monteagudo et al., (2021)
ML1208-06BB	2371	6.408	161.007	20	11.25	0.12	12.585	0.523	0.203	0.233	0.431	G. ruber	This study
ML1208-06BB	2371	6.408	161.007	28	15.7	0.085	18.17	0.43	0.245	0.217	0.458	G. ruber	Monteagudo et al., (2021)
ML1208-06BB	2371	6.408	161.007	30	14.5	0.16	16.714	0.583	0.289	0.29	0.579	G. ruber	This study
ML1208-06BB	2371	6.408	161.007	40	19.65	0.24	22.748	0.637	0.343	0.285	0.68	G. ruber	This study
ML1208-06BB	2371	6.408	161.007	44	21.2	0.17	24.479	0.583	0.301	0.304	0.569	G. ruber	Monteagudo et al., (2021)
ML1208-06BB	2371	6.408	161.007	50	23.4	0.34	26.756	0.793	0.371	0.392	0.707	G. ruber	This study
ML1208-09MC	3163	6.39833	160.769	0.5	6.21	0.025	6.454	0.352	0.176	0.175	0.378	G. sacculifer	Monteagudo et al., (2021)
ML1208-10GC	2933	5.19767	160.434	0	10.65	0.45	11.766	1.281	0.568	0.682	1.131	G. ruber	Lynch-Stieglitz et al. (2015)
ML1208-11GC	2942	1.46917	157.581	0.5	2.85	0.02	2.427	0.42	0.169	0.236	0.356	G. sacculifer	Monteagudo et al., (2021)
ML1208-13BB	3050	-0.219667	155.961	0	4.78	0.045	4.85	0.42	0.238	0.209	0.426	G. ruber	Lynch-Stieglitz et al. (2015)
ML1208-13BB	3050	-0.219667	155.961	11	5.96	0.02	6.179	0.35	0.187	0.166	0.37	G. ruber	Costa et al., (2017)
ML1208-13BB	3050	-0.219667	155.961	20	9.64	0.03	10.378	0.471	0.214	0.206	0.469	G. ruber	Costa et al., (2017)
ML1208-13BB	3050	-0.219667	155.961	28	11.65	0.03	12.973	0.294	0.174	0.146	0.324	G. ruber	Costa et al., (2017)
ML1208-13BB	3050	-0.219667	155.961	34	14.58	0.04	16.816	0.447	0.219	0.215	0.44	G. ruber	Costa et al., (2016)
ML1208-13BB	3050	-0.219667	155.961	53	20.76	0.07	23.973	0.384	0.207	0.183	0.489	G. ruber	Costa et al., (2016)
ML1208-14MC	3049	-0.219667	155.961	0	3.46	0.035	3.158	0.397	0.2	0.197	0.378	G. ruber	Costa et al., (2016)
ML1208-14MC	3049	-0.219667	155.961	0.5	4.7	0.02	4.741	0.398	0.218	0.201	0.461	G. sacculifer	Monteagudo et al., (2021)
ML1208-14MC	3049	-0.219667	155.961	8	5.77	0.03	5.981	0.377	0.173	0.194	0.324	G. ruber	Costa et al., (2016)
ML1208-15GC	3597	0.1645	156.117	0	7.15	0.045	7.449	0.324	0.162	0.153	0.337	G. ruber	Lynch-Stieglitz et al. (2015)
ML1208-15GC	3597	0.1645	156.117	24	11.3	0.03	12.648	0.383	0.166	0.153	0.353	G. ruber	Monteagudo et al., (2021)
ML1208-15GC	3597	0.1645	156.117	40	17.7	0.065	20.466	0.445	0.213	0.226	0.424	G. sacculifer	Monteagudo et al., (2021)
ML1208-15GC	3597	0.1645	156.117	76	26.8	0.23	30.177	0.543	0.289	0.281	0.618	G. sacculifer	Monteagudo et al., (2021)
ML1208-15GC	3597	0.1645	156.117	212	6.21	0.02	6.454	0.35	0.175	0.174	0.376	G. sacculifer	Monteagudo et al., (2021)
ML1208-16BB	2926	0.482	156.448	0	3.79	0.03	3.57	0.406	0.204	0.198	0.412	G. ruber	This study
ML1208-16BB	2926	0.482	156.448	16	6.4	0.025	6.66	0.369	0.192	0.184	0.368	G. ruber	This study
ML1208-16BB	2926	0.482	156.448	36	12.45	0.06	13.857	0.447	0.253	0.196	0.518	G. ruber	This study
ML1208-16BB	2926	0.482	156.448	50	16.75	0.11	19.308	0.47	0.26	0.236	0.508	G. ruber	This study
ML1208-16BB	2926	0.482	156.448	60	19.85	0.18	22.971	0.55	0.304	0.287	0.623	G. ruber	This study
ML1208-17PC	2926	0.4815	156.448	22	9.29	0.25	9.911	0.765	0.409	0.34	0.787	G. ruber	Jacobel et al., (2016)
ML1208-17PC	2926	0.4815	156.448	32	11.3	0.35	12.584	1.009	0.425	0.481	0.855	G. ruber	Jacobel et al., (2016)
ML1208-18GC	3362	0.5855	156.659	0	3.32	0.045	2.996	0.383	0.213	0.183	0.402	G. sacculifer	Lynch-Stieglitz et al. (2015)
ML1208-18GC	3362	0.5855	156.659	16	5.53	0.06	5.722	0.384	0.181	0.187	0.381	G. ruber	Lynch-Stieglitz et al. (2015)
ML1208-18GC	3362	0.5855	156.659	32	8.9	0.055	9.401	0.413	0.223	0.195	0.458	G. ruber	Lynch-Stieglitz et al. (2015)
ML1208-18GC	3362	0.5855	156.659	48	9.8	0.04	10.596	0.412	0.271	0.217	0.475	G. ruber	Lynch-Stieglitz et al. (2015)
ML1208-18GC	3362	0.5855	156.659	60	13.75	0.09	15.758	0.506	0.249	0.257	0.491	G. ruber	Lynch-Stieglitz et al. (2015)
ML1208-18GC	3362	0.5855	156.659	68	15.25	0.06	17.641	0.449	0.24	0.228	0.456	G. ruber	Lynch-Stieglitz et al. (2015)
ML1208-18GC	3362	0.5855	156.659	92	22.5	0.13	25.866	0.419	0.213	0.198	0.459	G. sacculifer	Monteagudo et al., (2021)
ML1208-18GC	3362	0.5855	156.659	112	28.5	0.13	31.701	0.531	0.268	0.241	0.566	G. ruber	Lynch-Stieglitz et al. (2015)
ML1208-18GC	3362	0.5855	156.659	140	33.2	0.25	36.896	0.725	0.405	0.352	0.768	G. ruber	Lynch-Stieglitz et al. (2015)
ML1208-19GC	2956	0.825167	156.867	0	3.12	0.035	2.752	0.412	0.215	0.2	0.398	G. ruber	Lynch-Stieglitz et al. (2015)
ML1208-19GC	2956	0.825167	156.867	28.5	8.51	0.035	8.917	0.421	0.235	0.215	0.426	G. sacculifer	Monteagudo et al., (2021)
ML1208-19GC	2956	0.825167	156.867	48.5	14.55	0.07	16.779	0.469	0.227	0.23	0.46	G. ruber	Monteagudo et al., (2021)
ML1208-19GC	2956	0.825167	156.867	60.5	20.4	0.15	23.555	0.53	0.263	0.252	0.503	G. sacculifer	Monteagudo et al., (2021)
ML1208-20BB	2850	1.2735	157.262	0	3.86	0.03	3.656	0.399	0.211	0.194	0.421	G. ruber	Lynch-Stieglitz et al. (2015)
ML1208-20BB	2850	1.2735	157.262	7	5.38	0.02	5.558	0.36	0.189	0.174	0.367	G. ruber	Costa et al., (2017)
ML1208-20BB	2850	1.2735	157.262	27	11.4	0.03	12.749	0.307	0.154	0.16	0.331	G. ruber	Costa et al., (2017)
ML1208-20BB	2850	1.2735	157.262	34	13.05	0.03	14.781	0.577	0.266	0.284	0.481	G. ruber	Costa et al., (2017)
ML1208-20BB	2850	1.2735	157.262	40	14.685	0.04	16.947	0.452	0.224	0.218	0.425	G. ruber	Costa et al., (2016)
ML1208-20BB	2850	1.2735	157.262	55	19.1	0.07	22.178	0.426	0.19	0.192	0.413	G. ruber	Costa et al., (2016)
ML1208-21MC	2850	1.2735	157.262	0	2.33	0.025	1.78	0.394	0.2	0.191	0.386	G. ruber	Costa et al., (2016)
ML1208-21MC	2850	1.2735	157.262	8	3.5	0.035	3.206	0.414	0.208	0.193	0.382	G. ruber	Costa et al., (2016)
ML1208-25BB	3542	2.46267	159.395	4	6.73	0.03	7.026	0.366	0.171	0.193	0.343	G. ruber	Costa et al., (2017)
ML1208-25BB	3542	2.46267	159.395	16	11.15	0.035	12.487	0.464	0.166	0.207	0.325	G. ruber	Costa et al., (2017)
ML1208-25BB	3542	2.46267	159.395	21	12.9	0.035	14.547	0.518	0.28	0.287	0.511	G. ruber	Costa et al., (2017)
ML1208-25BB	3542	2.46267	159.395	25	15.95	0.06	18.434	0.373	0.191	0.188	0.374	G. ruber	Costa et al., (2016)
ML1208-25BB	3542	2.46267	159.395	35	22.4	0.1	25.771	0.431	0.182	0.183	0.41	G. ruber	Costa et al., (2016)
ML1208-26MC	3545	2.46267	159.395	0	3.9	0.035	3.706	0.391	0.222	0.193	0.434	G. ruber	Costa et al., (2016)
ML1208-26MC	3545	2.46267	159.395	8	4.74	0.035	4.795	0.399	0.225	0.209	0.451	G. ruber	Costa et al., (2016)
ML1208-27BB	3331	2.769	159.291	0	5.55	0.045	5.743	0.371	0.18	0.177	0.377	G. ruber	Lynch-Stieglitz et al., (2015)
ML1208-27BB	3331	2.769	159.291	0.5	6.78	0.025	7.078	0.355	0.174	0.181	0.337	G. sacculifer	Monteagudo et al., (2021)
ML1208-27BB	3331	2.769	159.291	8	7.54	0.025	7.819	0.312	0.166	0.156	0.339	G. ruber	Monteagudo et al., (2021)
ML1208-27BB	3331	2.769	159.291	15.5	10.05	0.035	10.93	0.455	0.209	0.23	0.448	G. ruber	Monteagudo et al., (2021)
ML1208-27BB	3331	2.769	159.291	43.5	18.4	0.085	21.338	0.494	0.282	0.271	0.52	G. ruber	Monteagudo et al., (2021)
ML1208-27BB	3331	2.769	159.291	68.5	27.2	0.25	30.53	0.531	0.277	0.299	0.504	G. ruber	Monteagudo et al., (2021)
ML1208-28BB	3153	2.97183	159.198	0	4.42	0.02	4.385	0.413	0.226	0.207	0.421	G. sacculifer	Monteagudo et al., (2021)
ML1208-28BB	3153	2.97183	159.198	8	5.95	0.025	6.168	0.359	0.185	0.169	0.366	G. ruber	Costa et al., (2017)
ML1208-28BB	3153	2.97183	159.198	24	8.46	0.025	8.852	0.411	0.232	0.201	0.418	G. ruber	Costa et al., (2017)
ML1208-28BB	3153	2.97183	159.198	34	10.55	0.03	11.646	0.459	0.267	0.238	0.512	G. ruber	Costa et al., (2017)
ML1208-28BB	3153	2.97183	159.198	46	13.55	0.04	15.494	0.441	0.236	0.221	0.463	G. ruber	Costa et al., (2017)
ML1208-28BB	3153	2.97183	159.198	54	16.6	0.06	19.136	0.399	0.221	0.206	0.413	G. ruber	Costa et al., (2016)
ML1208-28BB	3153	2.97183	159.198	75	25.4	0.16	28.763	0.547	0.217	0.256	0.455	G. ruber	Costa et al., (2016)
ML1208-29MC	3152	2.97167	159.198	0	4.77	0.02	4.836	0.405	0.226	0.206	0.424	G. ruber	Costa et al., (2016)
ML1208-29MC	3152	2.97167	159.198	8	4.2	0.015	4.096	0.424	0.216	0.212	0.422	G. ruber	Costa et al., (2016)
ML1208-31BB	2857	4.68283	160.052	0	11.2	0.06	12.539	0.47	0.17	0.196	0.352	G. ruber	Lynch-Stieglitz et al., (2015)
ML1208-31BB	2857	4.68283	160.052	4	6.7	0.045	6.994	0.373	0.194	0.18	0.356	G. ruber	Lynch-Stieglitz et al., (2015)
ML1208-31BB	2857	4.68283	160.052	12	6.28	0.05	6.529	0.354	0.195	0.177	0.391	G. ruber	Lynch-Stieglitz et al., (2015)
ML1208-31BB	2857	4.68283	160.052	36	10.45	0.03	11.507	0.43	0.254	0.208	0.486	G. ruber	Jacobel et al., (2016)
ML1208-31BB	2857	4.68283	160.052	40	11.55	0.045	12.886	0.297	0.156	0.152	0.327	G. ruber	Lynch-Stieglitz et al., (2015)
ML1208-31BB	2857	4.68283	160.052	48	14.1	0.035	16.213	0.464	0.229	0.228	0.461	G. ruber	Jacobel et al., (2016)
ML1208-31BB	2857	4.68283	160.052	56	16.1	0.045	18.583	0.388	0.214	0.188	0.362	G. ruber	Jacobel et al., (2016)
ML1208-31BB	2857	4.68283	160.052	72	17.45	0.075	20.167	0.493	0.225	0.229	0.447	G. ruber	Lynch-Stieglitz et al., (2015)
ML1208-31BB	2857	4.68283	160.052	84	23	0.12	26.363	0.447	0.293	0.247	0.511	G. ruber	Monteagudo et al., (2021)
ML1208-32BB	2926	5.19733	160.434	8	8.87	0.025	9.363	0.394	0.21	0.171	0.424	G. ruber	Costa et al., (2017)
ML1208-32BB	2926	5.19733	160.434	17	11	0.03	12.301	0.447	0.2	0.247	0.378	G. ruber	Costa et al., (2017)
ML1208-32BB	2926	5.19733	160.434	20	12.8	0.03	14.396	0.513	0.309	0.263	0.536	G. ruber	Costa et al., (2017)
ML1208-32BB	2926	5.19733	160.434	25	15.35	0.075	17.761	0.456	0.237	0.245	0.427	G. ruber	Costa et al., (2016)
ML1208-32BB	2926	5.19733	160.434	35	19.3	0.075	22.39	0.384	0.215	0.201	0.438	G. ruber	Costa et al., (2016)
ML1208-33MC	2933	5.1975	160.435	0	4.93	0.035	5.039	0.41	0.194	0.206	0.401	G. ruber	Costa et al., (2016)
ML1208-33MC	2933	5.1975	160.435	8	5.26	0.02	5.423	0.408	0.175	0.186	0.374	G. ruber	Costa et al., (2016)
ML1208-34BB	2963	5.62367	160.793	0	8.54	0.045	8.958	0.421	0.224	0.234	0.428	G. ruber	Lynch-Stieglitz et al., (2015)
ML1208-34BB	2963	5.62367	160.793	8	6.09	0.02	6.324	0.373	0.173	0.187	0.348	G. ruber	Monteagudo et al., (2021)
ML1208-34BB	2963	5.62367	160.793	20	20.7	0.11	23.914	0.505	0.207	0.225	0.489	G. ruber	Monteagudo et al., (2021)
ML1208-34BB	2963	5.62367	160.793	44	23.4	0.15	26.781	0.487	0.259	0.256	0.445	G. ruber	Monteagudo et al., (2021)
ML1208-35BB	3777	6.6695	160.731	0	18.65	0.24	21.636	0.738	0.346	0.391	0.663	G. ruber	This study
ML1208-35BB	3777	6.6695	160.731	0.5	12.45	0.04	13.855	0.432	0.242	0.191	0.49	G. sacculifer	Monteagudo et al., (2021)
ML1208-35BB	3777	6.6695	160.731	2	12.75	0.12	14.325	0.579	0.328	0.338	0.637	G. ruber	This study
ML1208-35BB	3777	6.6695	160.731	20	12.05	0.11	13.386	0.424	0.224	0.198	0.447	G. ruber	This study
ML1208-35BB	3777	6.6695	160.731	25	29.6	0.63	33.103	1.552	0.773	0.818	1.336	G. ruber	This study
ML1208-35BB	3777	6.6695	160.731	48	28.6	0.55	31.99	1.151	0.741	0.64	1.415	G. ruber	This study
ML1208-35BB	3777	6.6695	160.731	60	40.7	2.3	43.35	3.531	1.653	1.642	3.908	G. ruber	This study
ML1208-36BB	2855	6.827	161.041	0.5	7.95	0.025	8.24	0.348	0.191	0.156	0.358	G. ruber	Monteagudo et al., (2021)
ML1208-36BB	2855	6.827	161.041	5	7.92	0.025	8.209	0.346	0.181	0.158	0.35	G. ruber	Costa et al., (2017)
ML1208-36BB	2855	6.827	161.041	15	11.65	0.04	12.973	0.298	0.176	0.147	0.328	G. ruber	Costa et al., (2016)
ML1208-36BB	2855	6.827	161.041	19	13.95	0.035	16.016	0.453	0.229	0.224	0.457	G. ruber	Costa et al., (2017)
ML1208-36BB	2855	6.827	161.041	25	16.7	0.065	19.248	0.432	0.224	0.216	0.449	G. ruber	Costa et al., (2016)
ML1208-36BB	2855	6.827	161.041	28.5	19.05	0.09	22.125	0.466	0.196	0.211	0.427	G. ruber	Monteagudo et al., (2021)
ML1208-36BB	2855	6.827	161.041	36.5	25.7	0.29	29.074	0.681	0.368	0.362	0.756	G. sacculifer	Monteagudo et al., (2021)
ML1208-37BB	2798	7.0436	161.635	0	6.18	0.035	6.422	0.375	0.168	0.189	0.368	G. ruber	Lynch-Stieglitz et al., (2015)
ML1208-37BB	2798	7.0436	161.635	12	9.94	0.03	10.794	0.461	0.213	0.248	0.408	G. ruber	Jacobel et al., (2016)
ML1208-37BB	2798	7.0436	161.635	20	13.2	0.045	15.021	0.572	0.23	0.267	0.498	G. ruber	Jacobel et al., (2016)
ML1208-37BB	2798	7.0436	161.635	24	15.1	0.055	17.465	0.447	0.229	0.249	0.453	G. ruber	Jacobel et al., (2016)
ML1208-37BB	2798	7.0436	161.635	36	24.8	0.2	28.125	0.512	0.31	0.272	0.566	G. ruber	Jacobel et al., (2016)
ML1208-37BB	2798	7.0436	161.635	52	35	0.7	39.089	1.761	0.771	0.845	1.44	G. ruber	Jacobel et al., (2016)
ML1208-39MC	2859	6.82667	161.041	0	4.73	0.045	4.781	0.403	0.232	0.208	0.463	G. ruber	Costa et al., (2016)
ML1208-39MC	2859	6.82667	161.041	8	5.8	0.035	6.012	0.373	0.17	0.192	0.342	G. ruber	Costa et al., (2016)
ML1208-39MC	2859	6.82667	161.041	0.5	6.87	0.025	7.173	0.362	0.174	0.173	0.321	G. sacculifer	Monteagudo et al., (2021)
