# Supplementary material for: New controls on sedimentation and climate in the central equatorial Pacific Ocean
Source: Copernicus journal article supplement (doi:10.5194/gchron-7-123-2025), 2025-04-01
Supplement: Supplementary file 2 [file gchron-7-123-2025-supplement.zip]

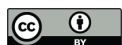

## *Supplement of*

# **New controls on sedimentation and climate in the central equatorial Pacific Ocean**

**Allison W. Jacobel et al.**

*Correspondence to:* Allison W. Jacobel (ajacobel@middlebury.edu)

- gchron-7-123-2025-supplement-title-page.pdf
- SupInfo.pdf
- Table\_S1.xlsx

The copyright of individual parts of the supplement might differ from the article licence.
